# Supplementary material for: Unraveling a Historical Mystery: Identification of a Lichen Dye Source in a Fifteenth Century Medieval Tapestry
Source: MDPI journal article supplement (doi:10.3390/heritage7050112), 2024-05-01
Supplement: s1 [file s1]

*Lecanora sulphurata*, acetone extraction

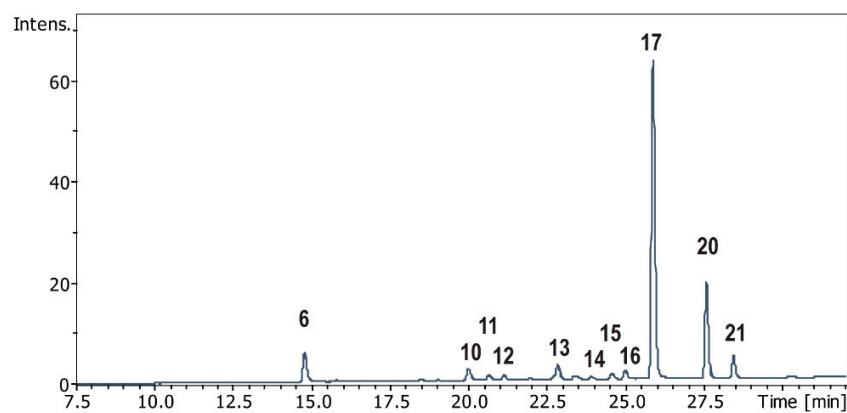

**Figure S1:** *Lecanora sulphurata* extracted with acetone.

*Lecanora sulphurata*, oxalic acid extraction

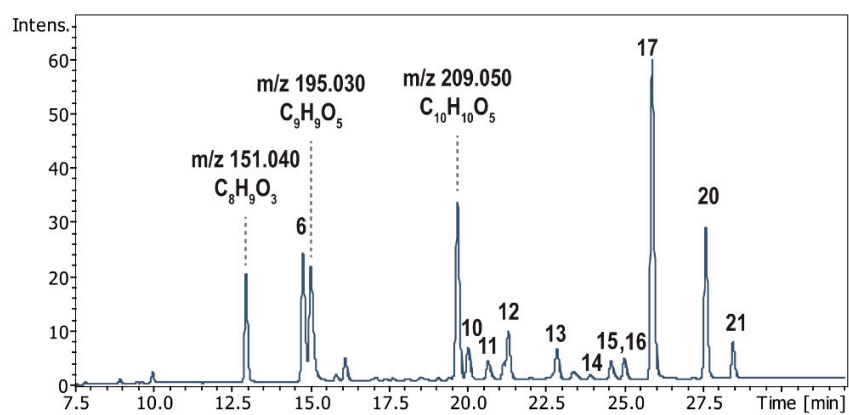

**Figure S2:** *Lecanora sulphurata* after extraction with 0.01 M oxalic acid (aqueous)/pyridine/methanol solution (3:3:4 v/v/v).

(a)

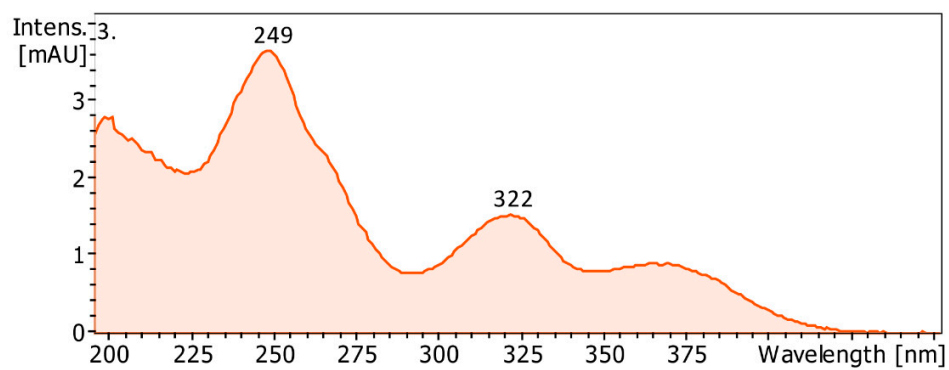

(b)

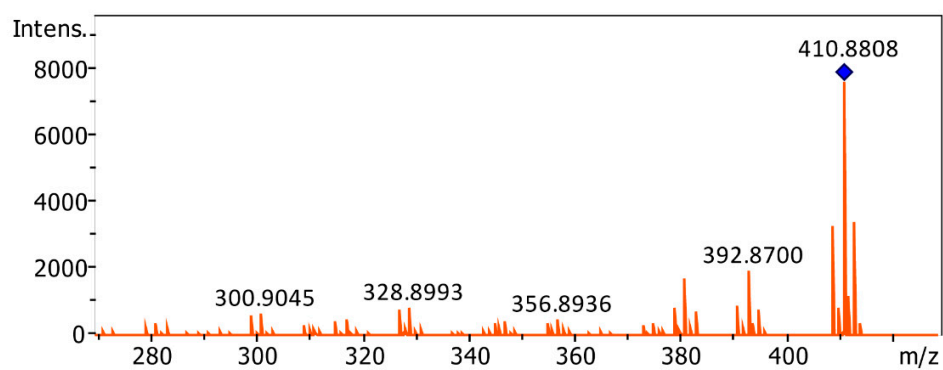

**Figure S3:** UV-visible spectrum (a) and MS/MS fragmentation spectrum (b) for the unidentified compound **10** with chemical formula  $C_{14}H_6Cl_4O_6$  at 20.2 minutes in both the tapestry, *Lecanora sulphurata*, and *Lecidella asema*.

*Lecanora sulphurata*, acetone extraction

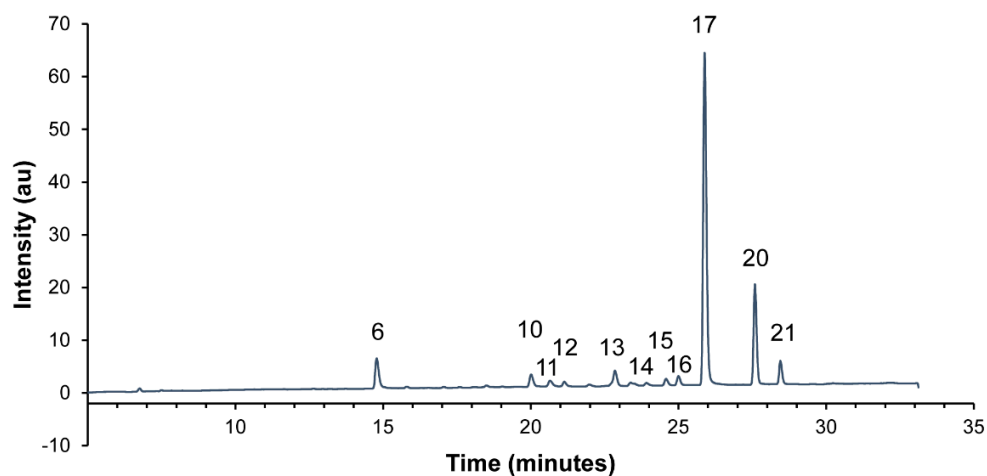

*Lecanora alboflavida*, acetone extraction

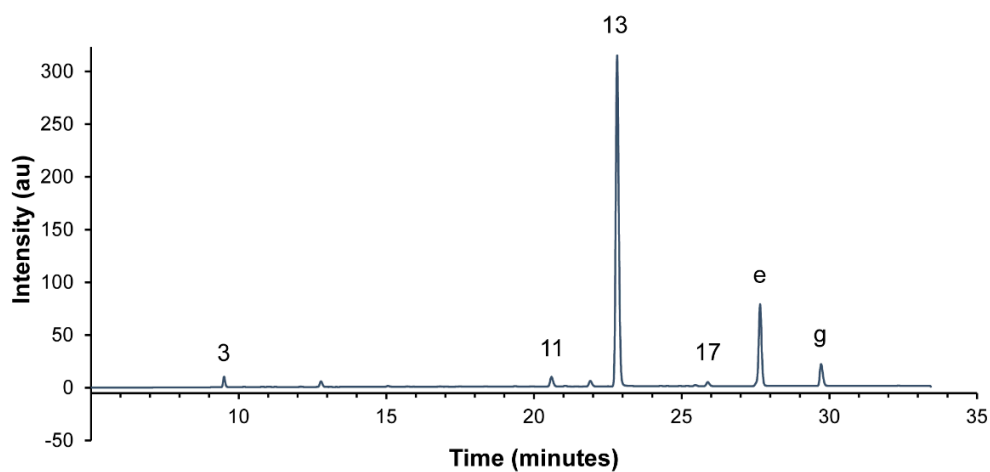

*Lecidella asema*, acetone extraction

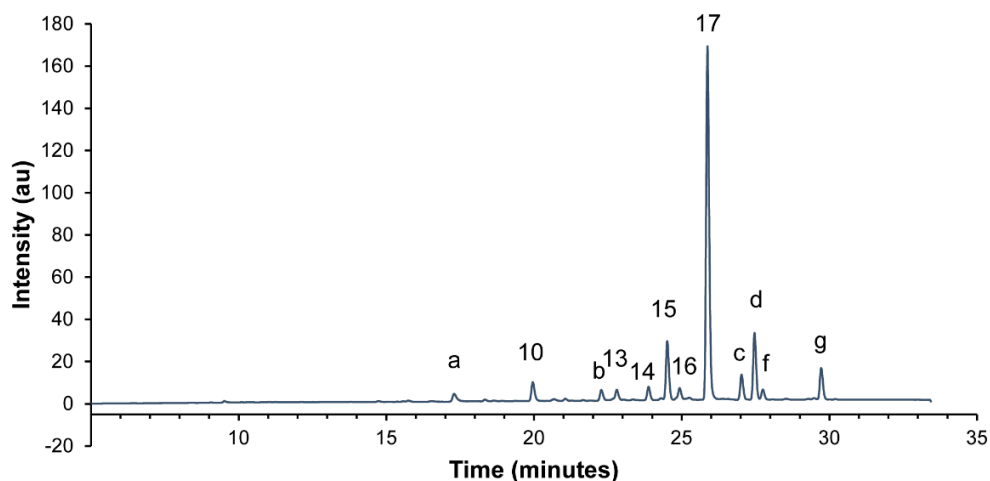

**Figure S4:** 350 nm UV chromatograms for *Lecanora sulphurata* (top), *Lecanora alboflavida* (middle), and *Lecidella asema* (bottom) extracted with acetone. The retention times for *Lecanora alboflavida* and *Lecidella asema* have been adjusted by +0.3 minutes for comparison.

Table S1: Chemical composition of three lichen references: *Lecanora sulphurata*, *Lecanora alboflavida*, and *Lecidella asema*.

<sup>a</sup>Retention times for *Lecanora alboflavida* and *Lecidella asema* have all been adjusted by 0.3 to account for minor changes to analytical column that occurred since tapestry and *Lecanora sulphurata* were analyzed. <sup>b</sup>Hydrolysable tannins not produced by *Lecanora alboflavida*, but from *Quercus spp.* support.

|   | Compound name                                                 | RT (min) | [M-H] <sup>-</sup> , m/z | Product ions, m/z                      | $\lambda_{\max}$ , nm | Present in tapestry? | <i>Lecanora sulphurata</i> | <i>Lecanora alboflavida</i> | <i>Lecidella asema</i> |
|---|---------------------------------------------------------------|----------|--------------------------|----------------------------------------|-----------------------|----------------------|----------------------------|-----------------------------|------------------------|
| 3 | ellagic acid                                                  | 9.6      | 300.999                  | 284, 257, 245, 229, 173, 145           | 252, 366              | Yes                  | -                          | + <sup>b</sup>              | -                      |
| 4 | O-methyl ellagic acid                                         | 11.3     | 315.015                  | 300                                    | -                     | Yes                  | -                          | Trace <sup>b</sup>          | -                      |
| 6 | C <sub>14</sub> H <sub>4</sub> Cl <sub>4</sub> O <sub>7</sub> | 14.8     | 422.863                  | 381, 346, 318, 307, 289, 279, 251, 224 | 198, 249, 320, 366    | -                    | +                          | -                           | trace                  |
| a | C <sub>15</sub> H <sub>7</sub> Cl <sub>3</sub> O <sub>7</sub> | 17.3     | 402.918                  | 359, 344, 316, 280, 252                | 204, 250, 318, ~360   | -                    | -                          | -                           | + <sup>a</sup>         |

|    |                                                               |      |         |                                             |                              |     |   |                |                |
|----|---------------------------------------------------------------|------|---------|---------------------------------------------|------------------------------|-----|---|----------------|----------------|
| 10 | C <sub>14</sub> H <sub>6</sub> Cl <sub>4</sub> O <sub>6</sub> | 20   | 408.885 | 393,<br>381,<br>357,<br>329                 | 211,<br>246,<br>317,<br>355  | Yes | + | -              | + <sup>a</sup> |
| 11 | 4,5-dichloro-norlichexanthone                                 | 20.6 | 324.967 | 290,<br>261,<br>233,<br>183                 | 211,<br>246,<br>317,<br>~366 | -   | + | + <sup>a</sup> | t              |
| 12 | 2,5-dichloro-norlichexanthone                                 | 21.1 | 324.967 | 290,<br>261,<br>233,<br>183                 | 197,<br>247,<br>316          | -   | + | t <sup>a</sup> | t <sup>a</sup> |
| b  | C <sub>15</sub> H <sub>9</sub> Cl <sub>3</sub> O <sub>6</sub> | 22.3 | 388.939 | 376,<br>347,<br>310,<br>282,<br>246,<br>218 | 200,<br>250,<br>320,<br>~360 | -   | - | -              | + <sup>a</sup> |
| 13 | 2,4,5-trichloro-norlichexanthone (arthothelin)                | 22.7 | 358.929 | 323,<br>295,<br>267,<br>259,<br>231         | 212,<br>249,<br>315          | Yes | + | + <sup>a</sup> | + <sup>a</sup> |
| 14 | 4,5,7-trichloronorlichexanthone (asemone)                     | 23.8 | 358.929 | 324,<br>295,<br>267.0                       | 248,<br>314,<br>352<br>(sh)  | Yes | + | -              | + <sup>a</sup> |

|    |                                                                 |      |         |                                            |                         |     |   |                |                |
|----|-----------------------------------------------------------------|------|---------|--------------------------------------------|-------------------------|-----|---|----------------|----------------|
| 15 | 2,5,7-trichloro-norlichexanthone (isoarthothelin)               | 24.5 | 358.929 | 324, 295, 267, 181, 163.0 137.1            | 201, 250, 315, 350 (sh) | Yes | + | trace          | + <sup>a</sup> |
| 16 | 2,4,7-trichloro-norlichexanthone                                | 25.0 | 358.929 | 323, 295, 287, 267, 259, 231, 177, 149     | 201, 247, 314, 350 (sh) | -   | + | -              | + <sup>a</sup> |
| 17 | 2,4,5,7-tetrachloronorlichexanthone (thiophanic acid)           | 25.8 | 392.89  | 360, 329, 321, 301, 293, 264 303, 265, 149 | 200, 250, 316, 355 (sh) | Yes | + | + <sup>a</sup> | + <sup>a</sup> |
| 18 | C <sub>15</sub> H <sub>9</sub> Cl <sub>3</sub> O <sub>5</sub> A | 26.4 | 372.944 | 358, 330, 294, 266, 97                     | -                       | Yes | - | -              | -              |

|    |                                                                          |      |         |                                                                     |                              |           |   |                |                |
|----|--------------------------------------------------------------------------|------|---------|---------------------------------------------------------------------|------------------------------|-----------|---|----------------|----------------|
| c  | C <sub>15</sub> H <sub>10</sub> Cl <sub>2</sub> O <sub>5</sub>           | 27.0 | 338.983 | 324,<br>296,<br>260,<br>232                                         | 201,<br>247,<br>311,<br>~350 | -         | - | -              | + <sup>a</sup> |
| 20 | atranorin                                                                | 27.5 | 373.093 | 177,<br>163,<br>133,<br>119,<br>105                                 | 208,<br>250,<br>319          | -         | + | -              | -              |
| d  | 3- <i>O</i> -methyl-2,5,7-trichloro-<br>norlichexanthone                 | 27.5 | 372.944 | 358,<br>330,<br>294,<br>266                                         | 199,<br>250,<br>314,<br>~351 | tentative | - | -              | + <sup>a</sup> |
| e  | 3- <i>O</i> -methyl-2,4,5-<br>trichloronorlichexanthone<br>(thuringione) | 27.6 | 372.944 | 360,<br>332,<br>294,<br>266,<br>177,<br>163,<br>133,<br>119,<br>105 | 195,<br>217,<br>314          | -         | - | + <sup>a</sup> | -              |
| f  | C <sub>15</sub> H <sub>9</sub> Cl <sub>3</sub> O <sub>5</sub>            | 27.7 | 372.944 | 358,<br>330,<br>294,<br>266                                         | 199,<br>246,<br>314,<br>355  | -         | - | -              | + <sup>a</sup> |
| 21 | chloroatranorin                                                          | 28.5 | 407.054 | 211,<br>167,<br>163,<br>139,<br>131,<br>119                         | 211,<br>248,<br>~350         | -         | + | -              | -              |

|   |                    |      |         |                             |                               |   |   |                |                |
|---|--------------------|------|---------|-----------------------------|-------------------------------|---|---|----------------|----------------|
| g | $C_{15}H_8Cl_4O_5$ | 29.7 | 406.905 | 394,<br>366,<br>330,<br>302 | 195,<br>218,<br>~310,<br>~355 | - | - | + <sup>a</sup> | + <sup>a</sup> |
|---|--------------------|------|---------|-----------------------------|-------------------------------|---|---|----------------|----------------|



*Lecanora sulphurata*-dyed wool, boiled 3 hours, oxalic acid extraction

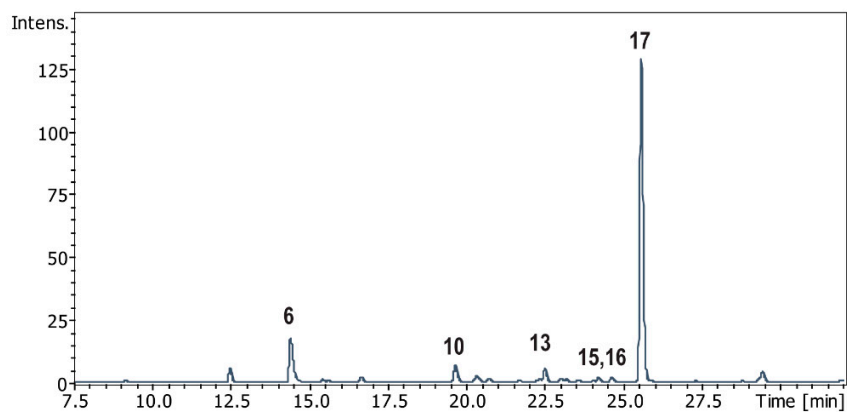

**Figure S5:** 350 nm UV chromatograph of *Lecanora sulphurata* after boiling with wool for 3 hours followed by mild extraction with oxalic acid.
